# Supplementary material
Source: HighWire-hosted journal article supplement (https://cmajopen-stage.highwire.org/highwire/filestream/80997/field_highwire_adjunct_files/0/open-2015-0106-original-submission.pdf)
Supplement: open-2015-0106-original-submission.pdf [file open-2015-0106-original-submission.pdf]

1  
2  
3  
4  
5  
6  
7  
8  
9  
10  
11  
12  
13  
14

## PREVALENCE AND PREDICTORS OF FACING A LEGAL OBLIGATION TO DISCLOSE HIV SEROSTATUS TO SEXUAL PARTNERS AMONG A COHORT OF PEOPLE LIVING WITH HIV WHO INJECT DRUGS IN A CANADIAN SETTING: A CROSS-SECTIONAL ANALYSIS.

15  
16  
17  
18  
19  
20  
21  
22  
23  
24  
25  
26

Sophie Patterson<sup>1,2</sup>, MBChB; Angela Kaida<sup>1</sup>, PhD; Paul Nguyen<sup>2</sup>, PhD; Sabina Dobrer<sup>2</sup>, MA; Gina Ogilvie<sup>3,4</sup>, MD; Robert Hogg<sup>1,2</sup>, PhD; Thomas Kerr<sup>2,4</sup>, PhD; Julio Montaner<sup>2,4</sup>, MD; Evan Wood<sup>2,4</sup>, MD; M-J Milloy<sup>2,4</sup>, PhD.

- 27  
28  
29  
30  
31  
32  
33  
34  
35  
36  
37  
38  
39  
40
1. Faculty of Health Sciences, Simon Fraser University, Burnaby
  2. British Columbia Centre for Excellence in HIV/AIDS, St. Paul's Hospital, Vancouver
  3. British Columbia Women's Hospital and Healthcare Centre, Vancouver
  4. Faculty of Medicine, University of British Columbia, Vancouver

41  
42  
43  
44  
45  
46  
47  
48  
49  
50

Send correspondence to:

**M-J Milloy, PhD**  
Research Scientist,  
Urban Health Research Initiative,  
British Columbia Centre for Excellence in  
HIV/AIDS, St. Paul's Hospital  
608-1081 Burrard Street, Vancouver, B.C.  
V6Z 1Y6 CANADA

51  
52  
53  
54  
55  
56  
57  
58  
59  
60

Tel: (604) 682-2344 X 68473

Fax: (604) 806-8464

Email: [uhri-mjism@cfenet.ubc.ca](mailto:uhri-mjism@cfenet.ubc.ca)

**Keywords:** HIV criminalization, HIV non-disclosure, Supreme Court of Canada, injection drug use, Canada.

## ABSTRACT

**Background:** In October 2012, the Canadian Supreme Court ruled that people living with HIV must disclose their HIV status before sex that poses a “realistic possibility” of HIV transmission, clarifying that in circumstances where condom-protected penile-vaginal intercourse occurred with a low viral load (<1500 copies/mL), the realistic possibility of transmission would be negated. We estimated the proportion of people living with HIV who would face a legal obligation to disclose under these circumstances.

**Methods:** We used cross-sectional survey data from a cohort of people living with HIV who inject drugs. Participants interviewed since October 2012, self-reporting recent penile-vaginal intercourse were included. Participants self-reporting 100% condom use with a viral load consistently <1500 copies/mL were assumed to have no legal obligation to disclose. Logistic regression identified factors associated with facing a legal obligation to disclose.

**Results:** 176 participants were included (44% women): 94% had a low viral load, 60% self-reported 100% condom use. If condom use and low viral load were required to negate the realistic possibility of transmission, 44% would face a legal obligation to disclose. Factors associated with facing a legal obligation to disclose were female gender (AOR: 2.19, 95% CI: 1.13-4.24), having one recent sexual partner (vs. >1) (AOR: 2.68, 95% CI: 1.24-5.78), and self-reporting a stable relationship (AOR: 2.00, 95% CI: 1.03-3.91).

**Interpretation:** Almost half the participants would face a legal obligation to disclose to sexual partners under these circumstances (with an increased burden among women), adding further risk of criminalization within this marginalized and vulnerable community.

250 words (max 250 words)

## INTRODUCTION

Since the late 1980s, existing criminal or HIV-specific laws have been used in many settings worldwide to prosecute people living with HIV alleged to have put others at risk of acquiring HIV (1). The majority of these criminal prosecutions against people living with HIV have occurred in North America (1). Canada has the second highest absolute number of convictions of people living with HIV globally (1, 2). At the time of writing, an estimated 184 Canadians had been charged for allegedly failing to disclose their HIV status to sexual partners (3).

Most people accused of HIV non-disclosure in Canada have faced charges of aggravated sexual assault, based on the legal interpretation that non-disclosure of HIV status represents fraud, vitiating consent to an otherwise consensual sexual encounter. This charge carries a maximum life imprisonment sentence and mandatory life-long registration as a sexual offender, even in the absence of HIV transmission.

A new precedent for the use of the criminal law against people living with HIV in Canada was set on October 5, 2012, when the Supreme Court of Canada released its ruling on two major cases (4, 5). Proactive serostatus disclosure by an

1  
2  
3 HIV-positive individual must now precede any sexual activity that poses a  
4  
5 “realistic possibility” of HIV transmission. The Supreme Court clarified that in  
6  
7  
8 circumstances where a person living with HIV engaged in condom-protected  
9  
10 penile-vaginal intercourse with a low plasma HIV RNA viral load (defined by  
11  
12 the Supreme Court as <1500 copies/mL), there would be no realistic possibility  
13  
14 of HIV transmission, thus no legal duty to disclose (4). Whether this legal test  
15  
16 would hold true for sexual encounters besides penile-vaginal intercourse was not  
17  
18 clarified by the Supreme Court.  
19  
20  
21  
22

23 Establishing the absence of a realistic possibility of HIV transmission may  
24  
25 be possible for circumstances other than condom protected penile-vaginal sex  
26  
27 with a low viral load, depending on the evidence presented during criminal  
28  
29 trials. Indeed, the Supreme Court indicated that differing circumstances and  
30  
31 treatment advances could lead to future adaptations of this legal position (4).  
32  
33 Lower courts may find greater flexibility in their interpretation of the realistic  
34  
35 possibility of HIV transmission. After the 2012 Supreme Court rulings, a teenage  
36  
37 boy was acquitted of aggravated sexual assault in the Nova Scotia Youth Justice  
38  
39 Court after allegedly failing to disclose his HIV status prior to an episode of  
40  
41 penile-vaginal intercourse (6). Based on evidence presented during the trial, the  
42  
43 presiding judge deemed that there was no realistic possibility of HIV  
44  
45 transmission in the context of an undetectable viral load, regardless of whether  
46  
47 or not a condom was used. However, in the absence of consistency in the  
48  
49  
50  
51  
52  
53  
54  
55  
56  
57  
58  
59  
60

1  
2  
3 application of the Supreme Court's legal test by the lower courts, it is prudent to  
4  
5 assume the strictest interpretation of this ruling.  
6  
7

8  
9 There is no consensus regarding the effectiveness of legally enforced  
10 disclosure as an HIV prevention tool (7). Concerns remain that the  
11 criminalization of HIV non-disclosure fails to acknowledge the significant  
12 challenges of HIV disclosure, including secondary disclosure; isolation; rejection  
13 by partners, friends and family; violence; stigma and discrimination (8-10). The  
14 literature suggests that people living with HIV who inject drugs face unique  
15 barriers to safe disclosure in the criminalized environment in which they live,  
16 navigate sexual relationships, and seek care (8, 11, 12); including loss of income,  
17 drugs or housing and threats to personal safety in the form of emotional,  
18 physical and sexual violence (8, 11, 13).  
19  
20  
21  
22  
23  
24  
25  
26  
27  
28  
29  
30  
31  
32

33 Using cross-sectional data from a community-recruited cohort of people  
34 living with HIV who inject drugs, we estimated the proportion of participants  
35 who would face a legal obligation to disclose their HIV status before penile-  
36 vaginal intercourse if both condom use and a low viral load were required to  
37 remove the realistic possibility of HIV transmission, and avoid criminal liability  
38 for HIV non-disclosure (4, 5).  
39  
40  
41  
42  
43  
44  
45  
46  
47  
48  
49  
50

## 51 METHODS

### 52 *Data Sources*

53  
54  
55  
56  
57  
58  
59  
60

1  
2  
3 The AIDS Care Cohort to evaluate Exposure to Survival Services (ACCESS) is an  
4 ongoing observational prospective cohort study of people living with HIV who  
5 use illicit drugs in Vancouver. The study has been described previously (14).  
6 Briefly, individuals were eligible for study participation if they were HIV-  
7 positive, aged  $\geq 18$  years and had used illicit drugs other than cannabis in the 30  
8 days before baseline interview. Recruitment of ACCESS participants began in  
9 2005 and is ongoing. Snowball sampling methods are used, building on self-  
10 referral, word of mouth, and extensive street outreach, with recruitment  
11 materials displayed in clinics and storefront agencies. Recruitment efforts are  
12 focused in the Downtown Eastside area of Vancouver; the site of an explosive  
13 outbreak of HIV infection among people living with HIV who inject drugs and  
14 their sexual partners beginning in the mid-1990s (15). This area has high levels of  
15 illicit drug use, homelessness and poverty, and an active open drug market.

16  
17  
18  
19  
20  
21  
22  
23  
24  
25  
26  
27  
28  
29  
30  
31  
32  
33  
34  
35  
36 At recruitment, participants complete a baseline interviewer-administered  
37 questionnaire, which elicits information on lifetime and recent characteristics,  
38 behaviours and exposures, and a nurse-led questionnaire and interview, which  
39 includes blood tests for HIV clinical monitoring. At six-month intervals,  
40 participants are invited to complete follow-up interviews and nursing  
41 examinations. Within the cohort, loss to follow-up (defined as missing all  
42 interviews in the preceding 12 months) is 6 (interquartile range: 5, 7) per 100  
43 person years.  
44  
45  
46  
47  
48  
49  
50  
51  
52  
53  
54  
55  
56  
57  
58  
59  
60

1  
2  
3 HIV treatment records and clinical profiles held by the British Columbia  
4  
5 Centre for Excellence in HIV/AIDS Drug Treatment Program are accessed for all  
6  
7 ACCESS participants through a secure, confidential linkage. The British  
8  
9 Columbia Centre for Excellence in HIV/AIDS provides medications and clinical  
10  
11 monitoring tests, free of charge to all people living with HIV in British Columbia  
12  
13 through the government's universal healthcare plan (16).  
14  
15  
16

17  
18 The ACCESS study's semi-annual follow-up and confidential linkage to  
19  
20 comprehensive HIV clinical data through the Drug Treatment Program permits  
21  
22 longitudinal evaluation of the interrelationships of behavioural, environmental  
23  
24 and social-structural exposures on access and adherence to antiretroviral therapy  
25  
26 and HIV disease progression among more than 950 people living with HIV who  
27  
28 use illicit drugs (cohort size at the time of writing). ACCESS has been approved  
29  
30 by the University of British Columbia/Providence Healthcare Research Ethics  
31  
32 Board. All participants provide written informed consent to participate in the  
33  
34 study and are compensated \$30 for each visit. The survey does not collect data on  
35  
36 serostatus disclosure practices, thus this analysis does not present behaviours  
37  
38 that could be interpreted as legal offences under Canadian non-disclosure case  
39  
40 law.  
41  
42  
43  
44  
45  
46  
47  
48  
49

### 50 51 *Eligibility criteria*

52  
53 This cross-sectional analysis included ACCESS participants who had completed  
54  
55 an interview since October 5 2012, in order to capture sexual risk behaviours and  
56  
57  
58  
59  
60

1  
2  
3 viral profile since the Supreme Court ruling. We restricted inclusion to  
4  
5 participants with a history of injection drug use, who had at least one viral load  
6  
7 and CD4 measurement within 180 days of their baseline visit, and for whom data  
8  
9 on condom use were available. If a participant completed more than one  
10  
11 interview during the study period, data were drawn from the later interview. We  
12  
13 restricted inclusion to individuals who were sexually active, defined as self-  
14  
15 reporting penile-vaginal intercourse with commercial or non-commercial sex  
16  
17 partners in the six-month period before the interview. Penile-vaginal intercourse  
18  
19 was the focus of this analysis, as this was the type of sexual activity on which the  
20  
21 2012 Supreme Court ruling was based. The Supreme Court has yet to rule on  
22  
23 HIV non-disclosure in the context of anal or oral sex. The date of administrative  
24  
25 censoring was November 30, 2013.  
26  
27  
28  
29  
30  
31  
32  
33  
34  
35

## 36 **Measures**

### 37 **Primary outcome**

38  
39 We sought to identify participants who would face a legal obligation to disclose  
40  
41 their HIV status to sexual partners if condom-protected penile-vaginal  
42  
43 intercourse in the context of a low viral load (<1500 copies/mL) was required to  
44  
45 negate the realistic possibility of HIV transmission, and thus avoid criminal  
46  
47 liability for HIV non-disclosure. Participants who self-reported 100% condom  
48  
49 use during all episodes of penile-vaginal intercourse, and who also achieved  
50  
51 viral load measurements consistently <1500 copies/mL within six months before  
52  
53  
54  
55  
56  
57  
58  
59  
60



1  
2  
3 the study interview were assumed to face no legal obligation to disclose their  
4 HIV status to sexual partners (**Figure 1**). We assumed that participants would  
5 face a legal obligation to disclose if they self-reported <100% condom use  
6 (regardless of viral load), or if they failed to achieve a viral load consistently  
7 <1500 copies/mL (regardless of condom use).  
8  
9  
10  
11  
12  
13  
14  
15  
16  
17

### 18 **Explanatory variables**

19  
20 Explanatory variables were selected based on perceived importance following a  
21 comprehensive literature review, and availability within the dataset. We  
22 considered the following explanatory variables: age (per year increase); gender  
23 (female vs. male); ethnicity (Caucasian vs. non-Caucasian); recent injection drug  
24 use (yes vs. no); recent illicit drug use (excluding cannabis) (yes vs. no);  
25 homelessness, defined as living on the streets or with no fixed address (yes vs.  
26 no); employment in a regular/temporary job or self-employed (yes vs. no); sex  
27 work, defined as exchange of sex for money, drugs, clothing, or other property  
28 (yes vs. no); incarceration, defined as being in detention, prison or jail (yes vs.  
29 no); stable relationship, defined as being legally married/common law or having  
30 a regular partner (yes vs. no); and number of recent commercial and non-  
31 commercial sex partners (1 vs. >1). All non-fixed variables referred to behaviours  
32 or exposures in the six-month period before the interview except for relationship  
33 status, which referred to current status. We defined HIV treatment status by  
34 assessing the number of days participants had been dispensed antiretroviral  
35  
36  
37  
38  
39  
40  
41  
42  
43  
44  
45  
46  
47  
48  
49  
50  
51  
52  
53  
54  
55  
56  
57  
58  
59  
60

1  
2  
3 therapy in the six months before interview (• 1 vs. 0 days). While a history of  
4  
5 injection drug use was specified as an inclusion criterion for this analysis, we  
6  
7 included recent injection drug use as a covariate to signify ongoing drug use.  
8  
9

### 10 11 12 13 **Statistical Analysis**

14  
15 We calculated the proportion of participants who would face a legal obligation to  
16  
17 disclose HIV serostatus to sexual partners under the aforementioned  
18  
19 circumstances. Sociodemographic, behavioural, and clinical characteristics were  
20  
21 compared between participants who would face a legal obligation to disclose  
22  
23 versus those who would not, using Pearson's chi-squared test for categorical  
24  
25 variables (Fisher's exact test for small cell counts), and the Wilcoxon rank-sum  
26  
27 test for continuous variables. Logistic regression identified independent  
28  
29 covariates of facing a legal obligation to disclose. Candidates for model inclusion  
30  
31 were variables having  $p < 0.2$  in the bivariable analysis, or variables considered *a*  
32  
33 *priori* to influence likelihood of facing a legal obligation to disclose following  
34  
35 literature review.  
36  
37  
38  
39  
40  
41  
42

43 Imputation methods were used to recode data for 10 participants for  
44  
45 whom data related to number of recent sexual partners were missing.  
46  
47 Specifically, the median number of sexual partners within the cohort was  
48  
49 assigned to participants for whom data were not available. This method was  
50  
51 used to preserve statistical power and avoid biases associated with excluding  
52  
53 these participants from the model.  
54  
55  
56  
57  
58  
59  
60

1  
2  
3 Model construction was based on the backwards selection approach and  
4 Akaike Information Criterion. The most parsimonious model was selected as the  
5 model with the lowest Akaike Information Criterion value. We computed the  
6 Variance Inflation Factor to quantify the degree of collinearity present in the  
7 regression analysis on the basis that a strong correlation between variables  
8 would increase the variance of the coefficients, rendering them unstable and  
9 complicating interpretation of the model output. The Variance Inflation Factor  
10 was <1.2 for all variables in the final model, suggesting that no collinearity was  
11 present. P-values were two-sided and considered statistically significant at  
12  $p < 0.05$ . All statistical analyses were conducted using the SAS software version  
13 9.3 (SAS Institute Inc, Cary, NC).  
14  
15  
16  
17  
18  
19  
20  
21  
22  
23  
24  
25  
26  
27  
28  
29  
30  
31  
32

### 33 RESULTS

34  
35 After applying the inclusion criteria, 176 (56% male) of the total 834 ACCESS  
36 participants recruited between 2005 and 2013 were included in our analytic  
37 sample. We excluded 97 participants without at least one viral load and CD4  
38 count test recorded within 180 days of their earliest interview; 47 participants  
39 without a history of injection drug use; 204 participants who had not completed  
40 an interview since October 5, 2012; 307 participants who reported no episodes of  
41 penile-vaginal intercourse within 6 months of the interview; and 3 participants  
42 for whom data on condom use were not available (**Figure 2**).  
43  
44  
45  
46  
47  
48  
49  
50  
51  
52  
53  
54  
55  
56  
57  
58  
59  
60

1  
2  
3  
4  
5  
6  
7  
8  
9  
10  
11  
12  
13  
14  
15  
16  
17  
18  
19  
20  
21  
22  
23  
24  
25  
26  
27  
28  
29  
30  
31  
32  
33  
34  
35  
The characteristics of the analytic sample are presented in **Table 1**. Of the 176 participants included in this analysis, 10 (6%) failed to achieve a viral load consistently <1500 copies/mL, and 70 (40%) self-reported <100% condom use during penile-vaginal intercourse within the six month period before the study interview. Among the 166 participants who consistently achieved a viral load <1500 copies/mL, 67 reported <100% condom use. If both condom use and a viral load <1500 copies/mL were required to negate the realistic possibility of HIV transmission and avoid criminal liability for HIV non-disclosure, 77 (44%) participants would face a legal obligation to proactively disclose their HIV status to sexual partners (**Table 2**). However, if either consistent condom use *or* a viral load <1500 copies/mL was sufficient to negate the realistic possibility of HIV transmission, only 3 (2%) participants would face a legal obligation to disclose (0% of males, 4% of females).

36  
37  
38  
39  
40  
41  
42  
43  
44  
45  
46  
47  
48  
49  
50  
51  
52  
53  
54  
55  
56  
57  
58  
59  
60  
When stratifying the results by gender, 35% of men vs. 55% of women would face a legal obligation to proactively disclose their HIV serostatus to sexual partners if both condom use and a viral load <1500 copies/mL were required to negate the realistic possibility of HIV transmission ( $p=0.011$ ). Compared to men, significantly fewer women achieved a viral load <1500 copies/mL (90% vs. 98%,  $p=0.022$ ) and significantly fewer women self-reported 100% condom use (52% vs. 67%,  $p = 0.048$ ) in the six month period before the study interview.

1  
2  
3  
4  
5  
6  
7  
8  
9  
10  
11  
12  
13  
14  
15  
16  
17  
18  
19  
20  
21  
22  
23  
24  
25  
26  
27  
28  
29  
30  
31  
32  
33  
34  
35  
36  
37  
38  
39  
40  
41  
42  
43  
44  
45  
46  
47  
48  
49  
50  
51  
52  
53  
54  
55  
56  
57  
58  
59  
60

In the multivariable logistic regression model, factors independently associated with facing a legal obligation to disclose were female gender (adjusted odds ratio [AOR]: 2.19, 95% CI: 1.13-4.24); having only one recent sexual partner (vs. >1 partners) (AOR: 2.68, 95% CI: 1.24-5.78); and self-reporting a stable relationship (AOR: 2.00, 95% CI: 1.03-3.91) (**Table 3**).

### INTERPRETATION

Among sexually-active participants in a community-recruited cohort of people living with HIV who inject drugs, we observed that almost half the participants would face a legal obligation to proactively disclose HIV serostatus to sexual partners if both condom use and a low viral load were required to negate the realistic possibility of HIV transmission. In a multivariable model, facing a legal obligation to disclose under these circumstances was positively associated with female gender, self-reporting a stable relationship and having only one recent sexual partner.

Facing a legal obligation to disclose was driven primarily by inconsistent condom use rather than viral load in this analysis. It should be noted that ACCESS is an older, treatment-experienced cohort, in a province with an ongoing Treatment-as-Prevention initiative (17, 18), and universal access to healthcare free-of-charge; including all HIV treatment, care and medications. In other jurisdictions where Treatment as Prevention initiatives are not widespread, additional challenges to the uptake and adherence to antiretroviral therapy may

1  
2  
3 be encountered, which may compromise the ability to satisfy this legal test for  
4  
5 HIV non-disclosure. Indeed, studies in other North American settings have  
6  
7 observed that members of marginalized and vulnerable groups, including people  
8  
9 who inject drugs (19-22), ethnic minorities (23), sex workers (24) and homeless  
10  
11 individuals (25) experience barriers to accessing antiretroviral therapy and  
12  
13 achieving sustained viral suppression.  
14  
15  
16

17  
18 We observed that women were significantly more likely to face a legal  
19  
20 obligation to disclose if both condom use and a low viral load were required to  
21  
22 negate the realistic possibility of HIV transmission, driven by both viral load and  
23  
24 condom use. Previous Canadian studies have shown that women demonstrate  
25  
26 poorer HIV-related clinical outcomes compared to men, mediated by suboptimal  
27  
28 engagement and retention within HIV services, and lower adherence to  
29  
30 antiretroviral therapy (19-22, 26, 27). Inconsistent condom use among women  
31  
32 living with HIV is well-described in the literature, attributed to fertility desire  
33  
34 and serocondordant partnerships, in addition to challenges negotiating condom  
35  
36 use; including gendered power imbalances, fear of inadvertent status disclosure,  
37  
38 and the threat of violence (28-31). Marginalized women living with HIV may  
39  
40 experience additional social-structural barriers to insisting upon safer sex  
41  
42 practices, particularly those who are economically disadvantaged and who  
43  
44 engage in survival sex work (9, 32, 33), compromising their ability to avoid  
45  
46 criminal liability for HIV non-disclosure through both achievement of a low viral  
47  
48 load and condom use.  
49  
50  
51  
52  
53  
54  
55  
56  
57  
58  
59  
60

1  
2  
3  
4  
5  
6  
7  
8  
9  
10  
11  
12  
13  
14  
15  
16  
17  
18  
19  
20  
21  
22  
23  
24  
25  
26  
27  
28  
29  
30  
31  
32  
33  
34  
35  
36  
37  
38  
39  
40  
41  
42  
43  
44  
45  
46  
47  
48  
49  
50  
51  
52  
53  
54  
55  
56  
57  
58  
59  
60

The observed gender difference in facing a legal obligation to disclose is a particular concern, as previous work has shown that women experience unique barriers to HIV disclosure (8); particularly those who face power inequality within dependent partnerships and risk violence or abandonment associated with disclosure (13, 34-36). A recent cross-sectional study among harder-to-reach people living with HIV in Vancouver found that women were significantly less likely to disclose to new sexual partners compared to heterosexual male counterparts (37).

Participants in a stable relationship were more likely to face a legal obligation to proactively disclose to sexual partners based on the legal test applied in this analysis. Unsurprisingly, this finding is driven by inconsistent condom use. This observation is supported by a previous analysis within ACCESS, which reported an independent association between condomless sex and partnered relationship status (32), and literature from other international settings (38) (39, 40). Previous work has shown that people living with HIV are more likely to disclose to regular versus casual sexual partners (41-43), thus it stands to reason that many ACCESS participants who are in a stable relationship will have disclosed to their partners and made a mutual decision to engage in condomless sex. Participants with only one recent sexual partner were also more likely to face a legal obligation to proactively disclose, which was similarly driven by inconsistent condom use. We expect that participants with more than one sexual partner are less likely to proactively disclose, and more likely to insist

1  
2  
3 on condom use. Previous work supports that people living with HIV with one  
4  
5 versus multiple sexual partners are more likely to self-report disclosing to  
6  
7 partners (44).  
8  
9

10  
11 Notably, if *either* condom use *or* a low viral load during penile-vaginal sex  
12  
13 were sufficient to negate the realistic possibility of HIV transmission, and avoid  
14  
15 criminal liability for non-disclosure, 98% participants in our cohort would face  
16  
17 no legal obligation to disclose to sexual partners. Public health and human rights  
18  
19 advocates have argued that, at a minimum, *either* condom use *or* a suppressed  
20  
21 viral load during vaginal or anal sex should be sufficient to remove the legal  
22  
23 obligation to disclose (emphasizing that additional factors might also be relevant  
24  
25 in determining HIV transmission risk on a case-by-case basis) (45). Further, they  
26  
27 maintain that the legal obligation to disclose should be removed in cases where  
28  
29 there is very low risk of transmission, such as in cases of oral sex (45, 46). The  
30  
31 requirement of both condom use and a low viral load to negate the realistic  
32  
33 possibility of sexual HIV transmission stands in conflict with evidence-based  
34  
35 science, demonstrating the dramatic reduction in HIV transmission risk  
36  
37 associated with either viral suppression with antiretroviral therapy (47-51) *or*  
38  
39 condom use (52). A recent consensus statement by Canadian HIV experts  
40  
41 forcefully argues that empirical evidence does not justify the current use of the  
42  
43 criminal law against people living with HIV in Canada (53). This statement has  
44  
45 since been endorsed by more than 75 scientists and clinicians across Canada (54).  
46  
47  
48  
49  
50  
51  
52  
53  
54  
55  
56  
57  
58  
59  
60



1  
2  
3  
4  
5  
6  
7  
8  
9  
10  
11  
12  
13  
14  
15  
16  
17  
18  
19  
20  
21  
22  
23  
24  
25  
26  
27  
28  
29  
30  
31  
32  
33  
34  
35  
36  
37  
38  
39  
40  
41  
42  
43  
44  
45  
46  
47  
48  
49  
50  
51  
52  
53  
54  
55  
56  
57  
58  
59  
60

It must be acknowledged that many ACCESS participants will disclose their HIV status to sexual partners, thus will not be at risk of criminal charges regardless of condom use or viral profile. Disclosure practices are not measured within the ACCESS survey, however a cross-sectional survey of treatment-experienced people living with HIV in Vancouver found that the majority (73%) of participants self-reported disclosing their HIV serostatus to all new sexual partners (37).

Readers should be aware of some limitations to our study. As data on HIV serostatus of sexual partners are not routinely collected within the ACCESS survey, we could not identify seroconcordant partnerships where legal concerns around HIV exposure and transmission may be reduced, rates of disclosure may be higher (43) and condom use may be lower (55). Condom use was self-reported, therefore subject to recall and social desirability reporting biases, resulting in potential underestimation of the proportion of participants who would face a legal obligation to disclose.

Findings from this study may not be generalizable to non-Canadian settings due to the specificity of Canadian HIV non-disclosure case law. On account of the ambitious provincial scale-up of Treatment-as-Prevention in British Columbia (17, 18), our findings may underestimate the number of people living with HIV who inject drugs who would face a legal obligation to disclose in other provinces, where they may experience additional barriers to treatment engagement.

1  
2  
3 To conclude, we observed that if both condom use and a low viral load are  
4 required to remove the realistic possibility of HIV transmission and avoid  
5 criminal liability for HIV non-disclosure, almost half of the participants may risk  
6 criminal prosecution should they not disclose their HIV serostatus to sexual  
7 partners. Our study reveals another dimension to how the criminal justice  
8 system can shape the health and lives of people living with HIV who inject  
9 drugs, reinforcing the critical need for public health initiatives to address barriers  
10 to HIV treatment and support safe HIV status disclosure within marginalized  
11 communities.  
12  
13  
14  
15  
16  
17  
18  
19  
20  
21  
22  
23  
24

25  
26 Among this highly marginalized and criminalized cohort, women were at  
27 increased risk of prosecution if they did not disclose their HIV status. Our  
28 findings contravene the belief that HIV criminalization is a means of protecting  
29 women; a rationale previously used to support the expansion of the use of  
30 criminal law against people living with HIV (56). While women are  
31 underrepresented among defendants in Canadian non-disclosure prosecutions to  
32 date (46), marginalized women feature prominently among those who have  
33 faced criminal charges (46); including women living with addiction, survivors of  
34 abuse, and Indigenous women (57, 58). Our findings suggest that current case  
35 law may disproportionately impact the most marginalized and vulnerable  
36 women living with HIV in Canada, and may accentuate gendered barriers to  
37 healthcare engagement (59), and autonomous sexual decision-making (60).  
38  
39  
40  
41  
42  
43  
44  
45  
46  
47  
48  
49  
50  
51  
52  
53  
54  
55  
56  
57  
58  
59  
60  
61  
62  
63  
64  
65  
66  
67  
68  
69  
70  
71  
72  
73  
74  
75  
76  
77  
78  
79  
80  
81  
82  
83  
84  
85  
86  
87  
88  
89  
90  
91  
92  
93  
94  
95  
96  
97  
98  
99  
100  
101  
102  
103  
104  
105  
106  
107  
108  
109  
110  
111  
112  
113  
114  
115  
116  
117  
118  
119  
120  
121  
122  
123  
124  
125  
126  
127  
128  
129  
130  
131  
132  
133  
134  
135  
136  
137  
138  
139  
140  
141  
142  
143  
144  
145  
146  
147  
148  
149  
150  
151  
152  
153  
154  
155  
156  
157  
158  
159  
160  
161  
162  
163  
164  
165  
166  
167  
168  
169  
170  
171  
172  
173  
174  
175  
176  
177  
178  
179  
180  
181  
182  
183  
184  
185  
186  
187  
188  
189  
190  
191  
192  
193  
194  
195  
196  
197  
198  
199  
200  
201  
202  
203  
204  
205  
206  
207  
208  
209  
210  
211  
212  
213  
214  
215  
216  
217  
218  
219  
220  
221  
222  
223  
224  
225  
226  
227  
228  
229  
230  
231  
232  
233  
234  
235  
236  
237  
238  
239  
240  
241  
242  
243  
244  
245  
246  
247  
248  
249  
250  
251  
252  
253  
254  
255  
256  
257  
258  
259  
260  
261  
262  
263  
264  
265  
266  
267  
268  
269  
270  
271  
272  
273  
274  
275  
276  
277  
278  
279  
280  
281  
282  
283  
284  
285  
286  
287  
288  
289  
290  
291  
292  
293  
294  
295  
296  
297  
298  
299  
300  
301  
302  
303  
304  
305  
306  
307  
308  
309  
310  
311  
312  
313  
314  
315  
316  
317  
318  
319  
320  
321  
322  
323  
324  
325  
326  
327  
328  
329  
330  
331  
332  
333  
334  
335  
336  
337  
338  
339  
340  
341  
342  
343  
344  
345  
346  
347  
348  
349  
350  
351  
352  
353  
354  
355  
356  
357  
358  
359  
360  
361  
362  
363  
364  
365  
366  
367  
368  
369  
370  
371  
372  
373  
374  
375  
376  
377  
378  
379  
380  
381  
382  
383  
384  
385  
386  
387  
388  
389  
390  
391  
392  
393  
394  
395  
396  
397  
398  
399  
400  
401  
402  
403  
404  
405  
406  
407  
408  
409  
410  
411  
412  
413  
414  
415  
416  
417  
418  
419  
420  
421  
422  
423  
424  
425  
426  
427  
428  
429  
430  
431  
432  
433  
434  
435  
436  
437  
438  
439  
440  
441  
442  
443  
444  
445  
446  
447  
448  
449  
450  
451  
452  
453  
454  
455  
456  
457  
458  
459  
460  
461  
462  
463  
464  
465  
466  
467  
468  
469  
470  
471  
472  
473  
474  
475  
476  
477  
478  
479  
480  
481  
482  
483  
484  
485  
486  
487  
488  
489  
490  
491  
492  
493  
494  
495  
496  
497  
498  
499  
500  
501  
502  
503  
504  
505  
506  
507  
508  
509  
510  
511  
512  
513  
514  
515  
516  
517  
518  
519  
520  
521  
522  
523  
524  
525  
526  
527  
528  
529  
530  
531  
532  
533  
534  
535  
536  
537  
538  
539  
540  
541  
542  
543  
544  
545  
546  
547  
548  
549  
550  
551  
552  
553  
554  
555  
556  
557  
558  
559  
560  
561  
562  
563  
564  
565  
566  
567  
568  
569  
570  
571  
572  
573  
574  
575  
576  
577  
578  
579  
580  
581  
582  
583  
584  
585  
586  
587  
588  
589  
590  
591  
592  
593  
594  
595  
596  
597  
598  
599  
600  
601  
602  
603  
604  
605  
606  
607  
608  
609  
610  
611  
612  
613  
614  
615  
616  
617  
618  
619  
620  
621  
622  
623  
624  
625  
626  
627  
628  
629  
630  
631  
632  
633  
634  
635  
636  
637  
638  
639  
640  
641  
642  
643  
644  
645  
646  
647  
648  
649  
650  
651  
652  
653  
654  
655  
656  
657  
658  
659  
660  
661  
662  
663  
664  
665  
666  
667  
668  
669  
670  
671  
672  
673  
674  
675  
676  
677  
678  
679  
680  
681  
682  
683  
684  
685  
686  
687  
688  
689  
690  
691  
692  
693  
694  
695  
696  
697  
698  
699  
700  
701  
702  
703  
704  
705  
706  
707  
708  
709  
710  
711  
712  
713  
714  
715  
716  
717  
718  
719  
720  
721  
722  
723  
724  
725  
726  
727  
728  
729  
730  
731  
732  
733  
734  
735  
736  
737  
738  
739  
740  
741  
742  
743  
744  
745  
746  
747  
748  
749  
750  
751  
752  
753  
754  
755  
756  
757  
758  
759  
760  
761  
762  
763  
764  
765  
766  
767  
768  
769  
770  
771  
772  
773  
774  
775  
776  
777  
778  
779  
780  
781  
782  
783  
784  
785  
786  
787  
788  
789  
790  
791  
792  
793  
794  
795  
796  
797  
798  
799  
800  
801  
802  
803  
804  
805  
806  
807  
808  
809  
810  
811  
812  
813  
814  
815  
816  
817  
818  
819  
820  
821  
822  
823  
824  
825  
826  
827  
828  
829  
830  
831  
832  
833  
834  
835  
836  
837  
838  
839  
840  
841  
842  
843  
844  
845  
846  
847  
848  
849  
850  
851  
852  
853  
854  
855  
856  
857  
858  
859  
860  
861  
862  
863  
864  
865  
866  
867  
868  
869  
870  
871  
872  
873  
874  
875  
876  
877  
878  
879  
880  
881  
882  
883  
884  
885  
886  
887  
888  
889  
890  
891  
892  
893  
894  
895  
896  
897  
898  
899  
900  
901  
902  
903  
904  
905  
906  
907  
908  
909  
910  
911  
912  
913  
914  
915  
916  
917  
918  
919  
920  
921  
922  
923  
924  
925  
926  
927  
928  
929  
930  
931  
932  
933  
934  
935  
936  
937  
938  
939  
940  
941  
942  
943  
944  
945  
946  
947  
948  
949  
950  
951  
952  
953  
954  
955  
956  
957  
958  
959  
960  
961  
962  
963  
964  
965  
966  
967  
968  
969  
970  
971  
972  
973  
974  
975  
976  
977  
978  
979  
980  
981  
982  
983  
984  
985  
986  
987  
988  
989  
990  
991  
992  
993  
994  
995  
996  
997  
998  
999  
1000

1  
2  
3 among women living with HIV in Canada who are disproportionately affected  
4  
5  
6 by HIV or underserved by health services, and who encounter considerable  
7  
8  
9 barriers to safe disclosure.

## 10 11 **ACKNOWLEDGEMENTS AND FUNDING**

12  
13 The authors thank the study participants for their contribution to the research, as  
14 well as current and past researchers and staff. The ACCESS study is supported  
15 by the United States National Institutes of Health (R01-DA021525). This research  
16 was undertaken, in part, thanks to funding from the Canada Research Chairs  
17 program through a Tier 1 Canada Research Chair in Inner City Medicine, which  
18 supports Dr. Evan Wood. Dr. Milloy is supported in part by the US National  
19 Institutes of Health (R01DA021525). Dr. Patterson is supported by a Study  
20 Abroad Studentship from the Leverhulme Trust. Dr. Hogg has held grant  
21 funding from the National Institutes of Health, Canadian Institutes of Health  
22 Research National Health Research Development Program, and Health Canada.  
23 He has also received funding from GlaxoSmithKline and Merck Frosst  
24 Laboratories for participating in continued medical education programs. JM is  
25 supported by the British Columbia Ministry of Health and through an Avant-  
26 Garde Award (DP1-DA026182) from the National Institute of Drug Abuse  
27 (NIDA), at the US National Institutes of Health (NIH). He has also received  
28 financial support from the International AIDS Society, United Nations AIDS  
29 Program, World Health Organization, National Institutes of Health Research-  
30 Office of AIDS Research, National Institute of Allergy & Infectious Diseases, The  
31 United States President's Emergency Plan for AIDS Relief (PEPFAR), UNICEF,  
32 the University of British Columbia, Simon Fraser University, Providence Health  
33 Care and Vancouver Coastal Health Authority. This research was also supported  
34 through funding from the Canada Research Chairs program through a Tier 2  
35 Canada Research Chair in Global Perspectives in HIV and Sexual and  
36 Reproductive Health, which supports Dr. Angela Kaida.

## 37 38 39 40 41 42 43 44 45 **AUTHORS' CONTRIBUTIONS**

46  
47 SP, AK, RH, GO and MJM conceived the idea for this analysis. RH, JM, MJM, TK  
48 and EW contributed to design and acquisition of data. Data preparation and  
49 statistical analysis were conducted by SD and PN. Data interpretation was  
50 performed by SP, MJM, PN, SD and AK. SP drafted the initial manuscript, and  
51 all authors contributed to the final version. All authors have critically reviewed  
52 and approved the final manuscript, gave approval for publication and act as  
53 guarantors of the work.  
54  
55  
56  
57  
58  
59  
60

**REFERENCES:**

1. Bernard E, Bennett-Carlson R. Criminalization of HIV non-disclosure, exposure and transmission: background and current landscape. Geneva: UNAIDS; 2012 [cited 2015 September 14]. Available from: [http://www.unaids.org/sites/default/files/en/media/unaids/contentassets/documents/document/2012/BackgroundCurrentLandscapeCriminalisationHIV\\_Final.pdf](http://www.unaids.org/sites/default/files/en/media/unaids/contentassets/documents/document/2012/BackgroundCurrentLandscapeCriminalisationHIV_Final.pdf)
2. The Global Network of People Living with HIV (GNP+). The Global Criminalization Scan Report 2010 2010 [cited 2015 September 21]. Available from: [http://www.gnpplus.net/assets/wbb\\_file\\_updown/2045/Global Criminalisation Scan Report.pdf](http://www.gnpplus.net/assets/wbb_file_updown/2045/GlobalCriminalisationScanReport.pdf).
3. Personal Communication between Eric Mykhalovskiy and Sophie Patterson. October 23 2015.
4. Supreme Court of Canada. R. v. Mabior. 2 S.C.R. 584 2012 [cited 2015 31 January]. Available from: <https://scc-csc.lexum.com/scc-csc/scc-csc/en/item/10008/index.do>.
5. Supreme Court of Canada. R. v. D.C. 2 S.C.R. 626. 2012 [cited 2015 31 January]. Available from: <http://scc-csc.lexum.com/scc-csc/scc-csc/en/item/10010/index.do>.
6. Provincial Court of Nova Scotia. R. v. J.T.C., 2013 NSPC 105. 2013.
7. Simoni JM, Pantalone DW. Secrets and safety in the age of AIDS: does HIV disclosure lead to safer sex? Topics in HIV medicine. 2004;12(4):109-18.
8. Obermeyer CM, Baijal P, Pegurri E. Facilitating HIV disclosure across diverse settings: a review. American journal of public health. 2011;101(6):1011-23.
9. Montaner M, Pacey K, Pelltier L, Tyndall M, Shannon K. HIV disclosure laws within a criminalized sex industry: the failure of prevention strategies and policy to protect the basic human rights of sex workers. Oral presentation THAE0305. AIDS 2008; Mexico City2008.
10. Adam BD, Corriveau P, Elliott R, Globerman J, English K, Rourke S. HIV disclosure as practice and public policy. Crit Public Health. 2015;25(4):386-97.
11. Parsons JT, VanOra J, Missildine W, Purcell DW, Gomez CA. Positive and negative consequences of HIV disclosure among seropositive injection drug users. AIDS education and prevention. 2004;16(5):459-75.

12. Latkin C, Knowlton A, Forman V, Hoover D, Schroeder J, Hachey M, et al. Injection Drug Users' Disclosure of HIV Seropositive Status to Network Members. *AIDS and behavior*. 2001;5(4):297-305.
13. Gielen AC, McDonnell KA, Burke JG, O'Campo P. Women's lives after an HIV-positive diagnosis: disclosure and violence. *Maternal and child health journal*. 2000;4(2):111-20.
14. Strathdee SA, Palepu A, Cornelisse PG, Yip B, O'Shaughnessy MV, Montaner JS, et al. Barriers to use of free antiretroviral therapy in injection drug users. *JAMA*. 1998;280(6):547-9.
15. Patrick D, Strathdee S, Archibald C, Ofner M, Craib K, Cornelisse P, et al. Determinants of HIV seroconversion in injection drug users during a period of rising prevalence in Vancouver. *International journal of STD & AIDS*. 1997; 8:437 - 45.
16. Patterson S, Cescon A, Samji H, Cui Z, Yip B, Lepik KJ, et al. Cohort Profile: HAART Observational Medical Evaluation and Research (HOMER) Cohort. *International journal of epidemiology*. 2015;44(1):58-67.
17. Montaner JS, Wood E, Kerr T, Lima V, Barrios R, Shannon K, et al. Expanded highly active antiretroviral therapy coverage among HIV-positive drug users to improve individual and public health outcomes. *Journal of acquired immune deficiency syndromes (1999)*. 2010;55 Suppl 1:S5-9.
18. M-J Milloy, T Kerr, R Hogg, S Guillemi, J Montaner, Wood. E. Increasing rates of earlier antiretroviral treatment associated with elevated levels of optimal virologic response among HIV-positive illicit drug users during a treatment-as-prevention-based initiative in a Canadian setting [Oral presentation at the 8th IAS Conference on HIV Pathogenesis, Treatment and Prevention]. *Journal of the International AIDS Society*. 2015;18 (supplement 4):99.
19. Colley G, Cescon A, Raboud J, Shurgold S, Klein M, Cooper C, et al. Continuum of HIV Treatment in Canada, 2003–2012 [Oral Presentation: O042]. 23rd Annual Canadian Conference on HIV/ AIDS Research (CAHR 2014); St John's, Newfoundland, Canada, 2014.
20. Lourenco L, Colley G, Nosyk B, Shopin D, Montaner JS, Lima VD, et al. High levels of heterogeneity in the HIV cascade of care across different population subgroups in British Columbia, Canada. *PloS one*. 2014;9(12):e115277.
21. Cescon A, Patterson S, Chan K, Palmer AK, Margolese S, Burchell AN, et al. Gender differences in clinical outcomes among HIV-positive individuals on antiretroviral therapy in Canada: a multisite cohort study. *PloS one*. 2013;8(12):e83649.
22. Cescon AM, Cooper C, Chan K, Palmer AK, Klein MB, Machouf N, et al. Factors associated with virological suppression among HIV-positive individuals on highly active antiretroviral therapy in a multi-site Canadian cohort. *HIV medicine*. 2011;12(6):352-60.
23. Doshi RK, Milberg J, Isenberg D, Matthews T, Malitz F, Matosky M, et al. High rates of retention and viral suppression in the US HIV safety net system: HIV care continuum in the Ryan White HIV/AIDS Program, 2011. *Clinical infectious diseases*. 2015;60(1):117-25.
24. Ti L, Milloy MJ, Shannon K, Simo A, Hogg RS, Guillemi S, et al. Suboptimal plasma HIV-1 RNA suppression and adherence among sex workers who use illicit

- 1  
2  
3 drugs in a Canadian setting: an observational cohort study. *Sex Transm Infect.*  
4 2014;90(5):418-22.  
5  
6 25. Muthulingam D, Chin J, Hsu L, Scheer S, Schwarcz S. Disparities in  
7 engagement in care and viral suppression among persons with HIV. *Journal of*  
8 *acquired immune deficiency syndromes (1999).* 2013;63(1):112-9.  
9  
10 26. Tapp C, Milloy MJ, Kerr T, Zhang R, Guillemi S, Hogg R, et al. Female gender  
11 predicts lower access and adherence to antiretroviral therapy in a setting of free  
12 healthcare. *BMC Infectious Diseases.* 2011;11(86).  
13  
14 27. Patterson S, Cescon A, Samji H, Chan K, Zhang W, Raboud J, et al. Life  
15 expectancy of HIV-positive individuals on combination antiretroviral therapy in  
16 Canada. *BMC Infect Dis.* 2015;15:274.  
17  
18 28. Salters K, Chan K, Cescon A, Chen Y, Patterson S, Montaner J, et al.  
19 Relationship status and ART use are predictors of unprotected sex among a sample  
20 of harder-to-reach women living with HIV in British Columbia, Canada [Poster  
21 Presentation]. 7th IAS Conference on HIV Pathogenesis, Treatment and Prevention;  
22 Kuala Lumpur, Malaysia, 2013.  
23  
24 29. Peretti-Watel P, Spire B, Schiltz MA, Bouhnik AD, Heard I, Lert F, et al.  
25 Vulnerability, unsafe sex and non-adherence to HAART: evidence from a large  
26 sample of French HIV/AIDS outpatients. *Social science & medicine (1982).*  
27 2006;62(10):2420-33.  
28  
29 30. Pulerwitz J, Amaro H, De Jong W, Gortmaker S, Rudd R. Relationship power,  
30 condom use and HIV risk among women in the USA. *AIDS care.* 2002;14(6):789-800.  
31  
32 31. Wingood G, Diclemente R. Gender-related correlates and predictors of  
33 consistent condom use among young adult African-American women: a prospective  
34 analysis. *International journal of STD & AIDS.* 1998;9(3):139-45.  
35  
36 32. Marshall BD, Milloy MJ, Kerr T, Zhang R, Montaner J, Wood E. No evidence of  
37 increased sexual risk behaviour after initiating antiretroviral therapy among people  
38 who inject drugs. *AIDS.* 2010;24(14):2271-8.  
39  
40 33. Reilly T, Woo G. Predictors of High-Risk Sexual Behavior Among People  
41 Living With HIV/AIDS. *AIDS and behavior.* 2001;5(3):205-17.  
42  
43 34. World Health Organization. Gender dimensions of HIV status disclosure to  
44 sexual partners: rates, barriers and outcomes. 2004 [cited 2015 September 21].  
45 Available from: <http://www.who.int/gender/documents/genderdimensions.pdf>  
46  
47 35. Mackinnon E, Crompton C. The gender of lying: feminist perspectives on the  
48 non-disclosure of HIV status. *UBC Law Review.* 2012;45(2):407-47.  
49  
50 36. Siegel K, Lekas HM, Schrimshaw EW. Serostatus disclosure to sexual partners  
51 by HIV-infected women before and after the advent of HAART. *Women & health.*  
52 2005;41(4):63-85.  
53  
54 37. Hirsch AJ, Forrest JI, Kanters S, O'Brien N, Salters KA, McCandless L, et al.  
55 Factors associated with disclosure of HIV status among a cohort of individuals on  
56 antiretroviral therapy in British Columbia, Canada. *AIDS and behavior.*  
57 2014;18(6):1014-26.  
58  
59 38. Hasse B, Ledergerber B, Hirschel B, Vernazza P, Glass TR, Jeannin A, et al.  
60 Frequency and determinants of unprotected sex among HIV-infected persons: the  
Swiss HIV cohort study. *Clinical infectious diseases.* 2010;51(11):1314-22.



- 1  
2  
3 39. Ayiga N. Rates and predictors of consistent condom-use by people living with  
4 HIV/AIDS on antiretroviral treatment in Uganda. *J Health Popul Nutr.*  
5 2012;30(3):270-80.
- 6  
7 40. Kouyos RD, Hasse B, Calmy A, Cavassini M, Furrer H, Stockle M, et al.  
8 Increases in Condomless Sex in the Swiss HIV Cohort Study. *Open Forum Infect Dis.*  
9 2015;2(2):ofv077.
- 10  
11 41. Serovich J, Mosack K. Reasons for HIV disclosure or nondisclosure to casual  
12 sexual partners. *AIDS education and prevention : official publication of the*  
13 *International Society for AIDS Education.* 2003;15(1):70-80.
- 14  
15 42. Niccolai L, Dorst D, Myers L, Kissinger P. Disclosure of HIV status to sexual  
16 partners: Predictors and temporal patterns. *Sexually transmitted diseases.*  
17 1999;26:281- 5.
- 18  
19 43. Batterham P, Rice E, Rotheram-Borus M. Predictors of Serostatus Disclosure  
20 to Partners Among Young People Living with HIV in the Pre and Post-HAART Eras.  
21 *AIDS and behavior.* 2005;9(3):218-87.
- 22  
23 44. Stein MD, Freedberg KA, Sullivan LM, Savetsky J, Levenson SM, Hingson R, et  
24 al. Sexual ethics. Disclosure of HIV-positive status to partners. *Arch Intern Med.*  
25 1998;158(3):253-7.
- 26  
27 45. Canadian HIV/AIDS Legal Network. HIV non-disclosure and the criminal law:  
28 An analysis of two recent decisions of the Supreme Court of Canada 2012 [cited  
29 2015 24 May ]. Available from: [http://www.aidslaw.ca/site/wp-](http://www.aidslaw.ca/site/wp-content/uploads/2013/04/SCC_DecisionAnalysis-ENG.pdf)  
30 [content/uploads/2013/04/SCC\\_DecisionAnalysis-ENG.pdf](http://www.aidslaw.ca/site/wp-content/uploads/2013/04/SCC_DecisionAnalysis-ENG.pdf).
- 31  
32 46. Canadian HIV/AIDS Legal Network. The criminalization of HIV non-  
33 disclosure in Canada and internationally 2014 [cited 2015 September 21]. Available  
34 from: [http://www.aidslaw.ca/site/wp-](http://www.aidslaw.ca/site/wp-content/uploads/2014/09/CriminalInfo2014_ENG.pdf)  
35 [content/uploads/2014/09/CriminalInfo2014\\_ENG.pdf](http://www.aidslaw.ca/site/wp-content/uploads/2014/09/CriminalInfo2014_ENG.pdf).
- 36  
37 47. Cohen MS, Chen YQ, McCauley M, Gamble T, Hosseinipour MC, Kumarasamy  
38 N, et al. Prevention of HIV-1 infection with early antiretroviral therapy. *The New*  
39 *England journal of medicine.* 2011;365(6):493-505.
- 40  
41 48. Rodger A, Cambiano V, Bruun T, Vernazza P, Collins S, Estrada V, et al. HIV  
42 Transmission Risk Through Condomless Sex If HIV+ Partner On Suppressive ART:  
43 PARTNER Study. Conference on Retroviruses and Opportunistic Infections (CROI);  
44 March 3-6 2014; Boston2014.
- 45  
46 49. Attia S, Egger M, Muller M, Zwahlen M, Low N. Sexual transmission of HIV  
47 according to viral load and antiretroviral therapy: systematic review and meta-  
48 analysis. *AIDS.* 2009;23(11):1397-404.
- 49  
50 50. Loutfy MR, Wu W, Letchumanan M, Bondy L, Antoniou T, Margolese S, et al.  
51 Systematic review of HIV transmission between heterosexual serodiscordant  
52 couples where the HIV-positive partner is fully suppressed on antiretroviral  
53 therapy. *PloS one.* 2013;8(2):e55747.
- 54  
55 51. M Cohen, Y Chen, M McCauley, T Gamble, M Hosseinipour, N Kumarasamy, et  
56 al. Final results of the HPTN 052 randomized controlled trial: antiretroviral therapy  
57 prevents HIV transmission [Oral presentation, 8th IAS Conference on HIV  
58 Pathogenesis, Treatment and Prevention]. *Journal of the International AIDS Society.*  
59 2015;18 (Supplement 4):15.
- 60

- 1  
2  
3  
4  
5  
6  
7  
8  
9  
10  
11  
12  
13  
14  
15  
16  
17  
18  
19  
20  
21  
22  
23  
24  
25  
26  
27  
28  
29  
30  
31  
32  
33  
34  
35  
36  
37  
38  
39  
40  
41  
42  
43  
44  
45  
46  
47  
48  
49  
50  
51  
52  
53  
54  
55  
56  
57  
58  
59  
60
52. Weller S, Davis K. Condom effectiveness in reducing heterosexual HIV transmission. *The Cochrane database of systematic reviews*. 2002(1):Cd003255.
53. Loutfy M, Tyndall M, Baril JG, Montaner JS, Kaul R, Hankins C. Canadian consensus statement on HIV and its transmission in the context of criminal law. *The Canadian journal of infectious diseases & medical microbiology*. 2014;25(3):135-40.
54. Kazatchkine C, Bernard E, Eba P. Ending overly broad HIV criminalization: Canadian scientists and clinicians stand for justice. *Journal of the International AIDS Society*. 2015;18:20126.
55. Cicconi P, Monforte A, Castagna A, Quirino T, Alessandrini A, Gargiulo M, et al. Inconsistent condom use among HIV-positive women in the "Treatment as Prevention Era": data from the Italian DIDI study. *Journal of the International AIDS Society*. 2013;16:18591.
56. Amon J. The "Right to Know" or "Know Your Rights"? Human Rights and a People-Centred approach to Health Policy. In: Biehl J, Petryna A, editors. *When People Come First: Critical Studies in Global Health*. Princeton, New Jersey: Princeton University Press; 2013. p. 91 - 108.
57. Symington A. HIV exposure as assault: Progressive development or misplaced focus? In E. Sheehy (Ed.) *Sexual Assault in Canada: Law, Legal Practice and Women's Activism* (p 635-664) Ottawa: University of Ottawa Press; 2012.
58. Allard P, Kazatchkine C, Symington A. Criminal Prosecutions for HIV non-disclosure: protecting women from infection or threatening prevention efforts? In: Gahagan J, editor. *Women and HIV Prevention in Canada: Implications for Research, Policy and Practice*. Toronto, Ontario: Women's Press; 2013. p. 195-218.
59. Patterson S, Milloy M-J, Ogilvie G, Greene S, Nicholson V, Vonn M, et al. The impact of criminalization of HIV non-disclosure on the healthcare engagement of women living with HIV in Canada: A comprehensive review of the evidence. *JIAS*. 2015; In Press.
60. Kaida A, Carter A, De Pokomandy A, Patterson S, Proulx-Boucher K, Nohpal A, et al. Sexual inactivity and sexual satisfaction among women living with HIV in Canada in the context of growing social, legal, and public health surveillance. *JIAS*. 2015;18 (Suppl 5).



1  
2  
3  
4  
5  
6  
7  
8  
9  
10  
11  
12  
13  
14  
15  
16  
17  
18  
19  
20  
21  
22  
23  
24  
25  
26  
27  
28  
29  
30  
31  
32  
33  
34  
35  
36  
37  
38  
39  
40  
41  
42  
43  
44  
45  
46  
47  
48  
49  
50  
51  
52  
53  
54  
55  
56  
57  
58  
59  
60

## ACKNOWLEDGEMENTS AND FUNDING

The authors thank the study participants for their contribution to the research, as well as current and past researchers and staff. The ACCESS study is supported by the United States National Institutes of Health (R01-DA021525). This research was undertaken, in part, thanks to funding from the Canada Research Chairs program through a Tier 1 Canada Research Chair in Inner City Medicine, which supports Dr. Evan Wood. Dr. Milloy is supported in part by the US National Institutes of Health (R01DA021525). Dr. Patterson is supported by a Study Abroad Studentship from the Leverhulme Trust. Dr. Hogg has held grant funding from the National Institutes of Health, Canadian Institutes of Health Research National Health Research Development Program, and Health Canada. He has also received funding from GlaxoSmithKline and Merck Frosst Laboratories for participating in continued medical education programs. JM is supported by the British Columbia Ministry of Health and through an Avant-Garde Award (DP1-DA026182) from the National Institute of Drug Abuse (NIDA), at the US National Institutes of Health (NIH). He has also received financial support from the International AIDS Society, United Nations AIDS Program, World Health Organization, National Institutes of Health Research-Office of AIDS Research, National Institute of Allergy & Infectious Diseases, The United States President's Emergency Plan for AIDS Relief (PEPFAR), UNICEF,

**Table 1. Characteristics of 176 people living with HIV who inject drugs, stratified by satisfaction of the specified legal test for HIV non-disclosure.**

| Characteristic                              | All participants (n=176) | Satisfy legal test (n=99) | Do not satisfy (n=77) | p-value |
|---------------------------------------------|--------------------------|---------------------------|-----------------------|---------|
| Age (in years)                              |                          |                           |                       |         |
| Median (interquartile range)                | 45 (40 – 51)             | 46 (41 – 52)              | 44 (39 – 50)          | 0.070   |
| Caucasian ethnicity                         |                          |                           |                       |         |
| Yes                                         | 93 (53)                  | 49 (49)                   | 44 (57)               | 0.313   |
| No                                          | 83 (47)                  | 50 (51)                   | 33 (43)               |         |
| Female gender                               |                          |                           |                       |         |
| Yes                                         | 77 (44)                  | 35 (35)                   | 42 (55)               | 0.011   |
| No                                          | 99 (56)                  | 64 (65)                   | 35 (45)               |         |
| Homeless*                                   |                          |                           |                       |         |
| Yes                                         | 21 (12)                  | 9 (9)                     | 12 (16)               | 0.242   |
| No                                          | 155 (88)                 | 90 (91)                   | 65 (84)               |         |
| Employed*                                   |                          |                           |                       |         |
| Yes                                         | 44 (25)                  | 25 (25)                   | 19 (25)               | 0.930   |
| No                                          | 132 (75)                 | 74 (75)                   | 58 (75)               |         |
| Incarcerated*                               |                          |                           |                       |         |
| Yes                                         | 10 (6)                   | 4 (4)                     | 6 (8)                 | 0.337   |
| No                                          | 166 (94)                 | 95 (96)                   | 71 (92)               |         |
| Illicit drug use* <sup>†</sup>              |                          |                           |                       |         |
| Yes                                         | 162 (92)                 | 93 (94)                   | 69 (90)               | 0.401   |
| No                                          | 14 (8)                   | 6 (6)                     | 8 (10)                |         |
| Injection drug use*                         |                          |                           |                       |         |
| Yes                                         | 117 (66)                 | 66 (67)                   | 51 (66)               | 0.952   |
| No                                          | 59 (34)                  | 33 (33)                   | 26 (34)               |         |
| ≥1 day antiretroviral therapy dispensation* |                          |                           |                       |         |
| Yes                                         | 168 (95)                 | 98 (99)                   | 70 (91)               | 0.022   |
| No                                          | 8 (5)                    | 1 (1)                     | 7 (9)                 |         |
| Engaged in sex work*                        |                          |                           |                       |         |
| Yes                                         | 29 (16)                  | 19 (19)                   | 10 (13)               | 0.271   |
| No                                          | 147 (84)                 | 80 (81)                   | 67 (87)               |         |
| Currently in a stable relationship          |                          |                           |                       |         |
| Yes                                         | 74 (42)                  | 31 (31)                   | 43 (56)               | 0.001   |
| No                                          | 102 (58)                 | 68 (69)                   | 34 (44)               |         |
| Number of sexual partners* <sup>‡</sup>     |                          |                           |                       |         |
| 1                                           | 124 (70)                 | 61 (62)                   | 63 (82)               | 0.004   |
| >1                                          | 52 (30)                  | 38 (38)                   | 14 (18)               |         |

\*in the 6 months before interview; <sup>†</sup> excluding cannabis use; <sup>‡</sup> median imputation was used to recode missing data for 10 participants.

**Table 2. Patterns of condom use stratified by plasma HIV-1 RNA viral load (<1500 vs. ≥1500 c/mL) among 176 male and female people living with HIV who inject drugs.**

| <b>All participants (n=176)</b>   |                              |                              |
|-----------------------------------|------------------------------|------------------------------|
|                                   | Viral load <1500 c/mL, n (%) | Viral load ≥1500 c/mL, n (%) |
| Condom use                        |                              |                              |
| 100%                              | 99 (56)                      | 7 (4)                        |
| <100%                             | 67 (38)                      | 3 (2)                        |
| <b>Male participants (n=99)</b>   |                              |                              |
|                                   | Viral load <1500 c/mL, n (%) | Viral load ≥1500 c/mL, n (%) |
| Condom use                        |                              |                              |
| 100%                              | 64 (65)                      | 2 (2)                        |
| <100%                             | 33 (33)                      | 0 (0)                        |
| <b>Female participants (n=77)</b> |                              |                              |
|                                   | Viral load <1500 c/mL, n (%) | Viral load ≥1500 c/mL, n (%) |
| Condom use                        |                              |                              |
| 100%                              | 35 (45)                      | 5 (7)                        |
| <100%                             | 34 (44)                      | 3 (4)                        |

**Table 3. Bivariable and multivariable logistic regression analyses of factors associated with facing a legal obligation to disclose HIV serostatus to sexual partners among 176 people living with HIV who inject drugs.**

| Characteristic                          | Bivariable      |                     |         | Multivariable    |                     |         |
|-----------------------------------------|-----------------|---------------------|---------|------------------|---------------------|---------|
|                                         | OR <sup>2</sup> | 95% CI <sup>1</sup> | p-value | AOR <sup>3</sup> | 95% CI <sup>1</sup> | p-value |
| Age                                     |                 |                     |         |                  |                     |         |
| Per year increase                       | 0.96            | 0.93 – 1.00         | 0.070   |                  |                     |         |
| Gender                                  |                 |                     |         |                  |                     |         |
| Female vs. male                         | 2.19            | 1.19 – 4.04         | 0.011   | 2.19             | 1.13 – 4.24         | 0.020   |
| Homeless                                |                 |                     |         |                  |                     |         |
| Yes vs. no                              | 1.85            | 0.74 – 4.64         | 0.242   | 2.50             | 0.93 – 6.76         | 0.070   |
| Incarcerated*                           |                 |                     |         |                  |                     |         |
| Yes vs. no                              | 2.01            | 0.55 – 7.38         | 0.337   |                  |                     |         |
| Engaged in sex work*                    |                 |                     |         |                  |                     |         |
| Yes vs. no                              | 0.63            | 0.27 – 1.44         | 0.271   |                  |                     |         |
| Currently in a stable relationship      |                 |                     |         |                  |                     |         |
| Yes vs. no                              | 2.77            | 1.49 – 5.15         | 0.001   | 2.00             | 1.03 – 3.91         | 0.042   |
| Number of sexual partners* <sup>1</sup> |                 |                     |         |                  |                     |         |
| 1 vs. >1                                | 2.80            | 1.38 – 5.68         | 0.004   | 2.68             | 1.24 – 5.78         | 0.012   |

<sup>1</sup> median imputation was used to recode missing data for 10 participants; <sup>1</sup>95% Confidence Interval; <sup>2</sup>Odds Ratio; <sup>3</sup>Adjusted Odds Ratio; \*within the 6 months before interview..

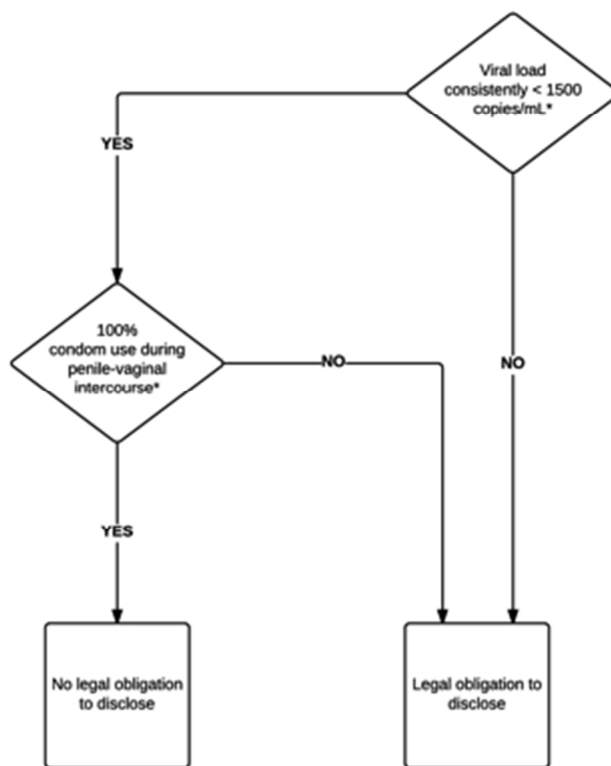

Figure 1: Criteria used to determine whether participants would face a legal obligation to disclose in this analysis.

\*In the six-month period before study interview  
120x146mm (72 x 72 DPI)

1  
2  
3  
4  
5  
6  
7  
8  
9  
10  
11  
12  
13  
14  
15  
16  
17  
18  
19  
20  
21  
22  
23  
24  
25  
26  
27  
28  
29  
30  
31  
32  
33  
34  
35  
36  
37  
38  
39  
40  
41  
42  
43  
44  
45  
46  
47  
48  
49  
50  
51  
52  
53  
54  
55  
56  
57  
58  
59  
60

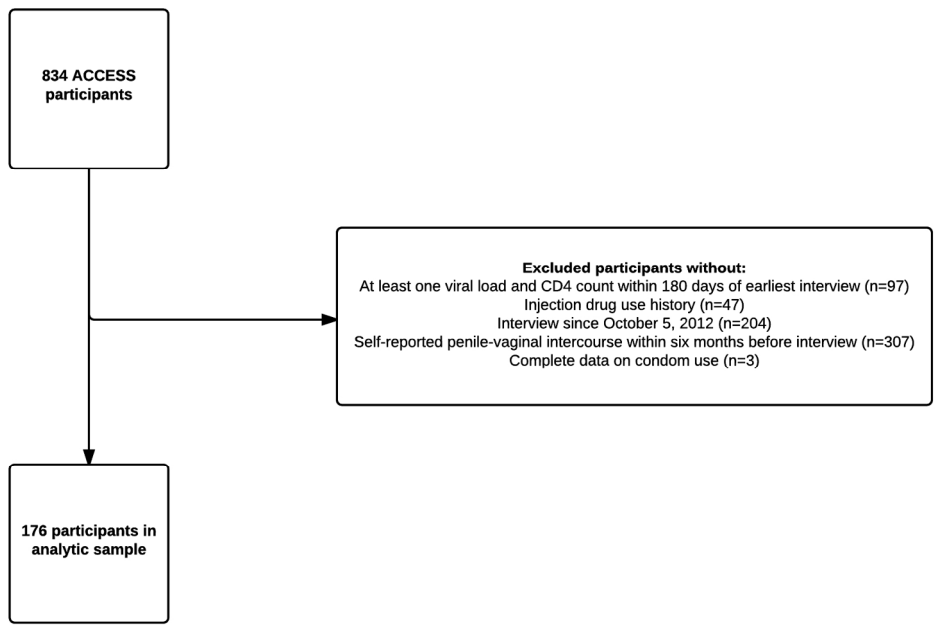

Figure 2: Exclusion criteria applied to reach final analytic sample.

STROBE Statement—Checklist of items that should be included in reports of *cross-sectional studies*

|                              | Item No | Recommendation                                                                                                                                                                                                                                                                                                                                                                                                |
|------------------------------|---------|---------------------------------------------------------------------------------------------------------------------------------------------------------------------------------------------------------------------------------------------------------------------------------------------------------------------------------------------------------------------------------------------------------------|
| <b>Title and abstract</b>    | 1       | (a) Indicate the study's design with a commonly used term in the title or the abstract<br>(b) Provide in the abstract an informative and balanced summary of what was done and what was found                                                                                                                                                                                                                 |
| <b>Introduction</b>          |         |                                                                                                                                                                                                                                                                                                                                                                                                               |
| Background/rationale         | 2       | Explain the scientific background and rationale for the investigation being reported                                                                                                                                                                                                                                                                                                                          |
| Objectives                   | 3       | State specific objectives, including any prespecified hypotheses                                                                                                                                                                                                                                                                                                                                              |
| <b>Methods</b>               |         |                                                                                                                                                                                                                                                                                                                                                                                                               |
| Study design                 | 4       | Present key elements of study design early in the paper                                                                                                                                                                                                                                                                                                                                                       |
| Setting                      | 5       | Describe the setting, locations, and relevant dates, including periods of recruitment, exposure, follow-up, and data collection                                                                                                                                                                                                                                                                               |
| Participants                 | 6       | (a) Give the eligibility criteria, and the sources and methods of selection of participants                                                                                                                                                                                                                                                                                                                   |
| Variables                    | 7       | Clearly define all outcomes, exposures, predictors, potential confounders, and effect modifiers. Give diagnostic criteria, if applicable                                                                                                                                                                                                                                                                      |
| Data sources/<br>measurement | 8*      | For each variable of interest, give sources of data and details of methods of assessment (measurement). Describe comparability of assessment methods if there is more than one group                                                                                                                                                                                                                          |
| Bias                         | 9       | Describe any efforts to address potential sources of bias                                                                                                                                                                                                                                                                                                                                                     |
| Study size                   | 10      | Explain how the study size was arrived at                                                                                                                                                                                                                                                                                                                                                                     |
| Quantitative variables       | 11      | Explain how quantitative variables were handled in the analyses. If applicable, describe which groupings were chosen and why                                                                                                                                                                                                                                                                                  |
| Statistical methods          | 12      | (a) Describe all statistical methods, including those used to control for confounding<br>(b) Describe any methods used to examine subgroups and interactions<br>(c) Explain how missing data were addressed<br>(d) If applicable, describe analytical methods taking account of sampling strategy<br>(e) Describe any sensitivity analyses                                                                    |
| <b>Results</b>               |         |                                                                                                                                                                                                                                                                                                                                                                                                               |
| Participants                 | 13*     | (a) Report numbers of individuals at each stage of study—eg numbers potentially eligible, examined for eligibility, confirmed eligible, included in the study, completing follow-up, and analysed<br>(b) Give reasons for non-participation at each stage<br>(c) Consider use of a flow diagram                                                                                                               |
| Descriptive data             | 14*     | (a) Give characteristics of study participants (eg demographic, clinical, social) and information on exposures and potential confounders<br>(b) Indicate number of participants with missing data for each variable of interest                                                                                                                                                                               |
| Outcome data                 | 15*     | Report numbers of outcome events or summary measures                                                                                                                                                                                                                                                                                                                                                          |
| Main results                 | 16      | (a) Give unadjusted estimates and, if applicable, confounder-adjusted estimates and their precision (eg, 95% confidence interval). Make clear which confounders were adjusted for and why they were included<br>(b) Report category boundaries when continuous variables were categorized<br>(c) If relevant, consider translating estimates of relative risk into absolute risk for a meaningful time period |
| Other analyses               | 17      | Report other analyses done—eg analyses of subgroups and interactions, and sensitivity analyses                                                                                                                                                                                                                                                                                                                |

1  
2  
3  
4  
5  
6  
7  
8  
9  
10  
11  
12  
13  
14  
15  
16  
17  
18  
19  
20  
21  
22  
23  
24  
25  
26  
27  
28  
29  
30  
31  
32  
33  
34  
35  
36  
37  
38  
39  
40  
41  
42  
43  
44  
45  
46  
47  
48  
49  
50  
51  
52  
53  
54  
55  
56  
57  
58  
59  
60

| <b>Discussion</b>        |    |                                                                                                                                                                            |
|--------------------------|----|----------------------------------------------------------------------------------------------------------------------------------------------------------------------------|
| Key results              | 18 | Summarise key results with reference to study objectives                                                                                                                   |
| Limitations              | 19 | Discuss limitations of the study, taking into account sources of potential bias or imprecision. Discuss both direction and magnitude of any potential bias                 |
| Interpretation           | 20 | Give a cautious overall interpretation of results considering objectives, limitations, multiplicity of analyses, results from similar studies, and other relevant evidence |
| Generalisability         | 21 | Discuss the generalisability (external validity) of the study results                                                                                                      |
| <b>Other information</b> |    |                                                                                                                                                                            |
| Funding                  | 22 | Give the source of funding and the role of the funders for the present study and, if applicable, for the original study on which the present article is based              |

\*Give information separately for exposed and unexposed groups.

**Note:** An Explanation and Elaboration article discusses each checklist item and gives methodological background and published examples of transparent reporting. The STROBE checklist is best used in conjunction with this article (freely available on the Web sites of PLoS Medicine at <http://www.plosmedicine.org/>, Annals of Internal Medicine at <http://www.annals.org/>, and Epidemiology at <http://www.epidem.com/>). Information on the STROBE Initiative is available at [www.strobe-statement.org](http://www.strobe-statement.org).
